# Supplementary material for: Alterations in Gene Array Patterns in Dendritic Cells from Aged Humans
Source: PLoS One. 2014 Sep 5;9(9):e106471. doi: 10.1371/journal.pone.0106471 (PMC4156347; doi:10.1371/journal.pone.0106471)
Supplement: Table S1 — A list of 260 genes with expression changes in DCs associated with donor age and meeting the criteria of p <0.05 (student's t -test), FDR <5%, and fold change ≥1.5. (XLS) [file pone.0106471.s002.xls]

## Sheet: A List of 260 genes 
Supplementary Table 1. A list of 260 genes with expression changes in DCs associated with donor age and meeting the criteria of p < 0.05 (student’s t-test), FDR < 5%, and fold change ≥ 1.5.
Group 1:	young
Group 2:	Aged
Statistics:	t-test
Correction:	Benjamini and Hochberg
Data Transformation:	Log Transformed
Tests:	2586
Gene Identifier	Proble ID	Gene ID	Ratio	Direction	p-value	Young Mean	Young SEM	Aged Mean	Aged SEM
NM_030804	210663_s_at	KYNU	1.5069	Down	0.046	9.80697	0.112485	9.21539	0.204838
NM_020037	205474_at	CRLF3	1.51	Down	0.0212824	10.051	0.177258	9.45958	0.071599
NM_006720	201544_x_at	PABPN1	1.51	Down	0.016828	11.6179	0.076532	11.0224	0.164652
AI057637	221507_at	TNPO2	1.51	Down	0.0123324	8.19805	0.124231	7.60728	0.111971
NM_001099	213995_at	ATP5S	1.54	Down	0.0127645	8.70716	0.169777	8.0864	0.050609
NM_025149	208095_s_at	CAMK2G	1.56	Down	0.020005	11.6917	0.09202	11.0457	0.183825
NM_001353	205354_at	GAMT	1.56	Down	0.0371307	5.52139	0.228293	4.88353	0.071025
U05598	221957_at	PDK3	1.56	Down	0.00586178	7.55648	0.153654	6.91334	0.012178
NM_000689	206471_s_at	PLXNC1	1.56	Down	0.0241279	5.18262	0.195039	4.54046	0.088863
NM_005165	219910_at	FICD	1.57	Down	0.021483	7.14604	0.093489	6.49332	0.189689
AW003635	214773_x_at	TIPRL	1.57	Down	0.0294891	8.70187	0.052624	8.04886	0.223663
NM_000480	205104_at	SNPH	1.58	Down	0.0258781	5.29384	0.202995	4.62975	0.098705
NM_025190	203430_at	HEBP2	1.59	Down	0.0190374	9.87249	0.140766	9.2064	0.154971
NM_001150	221437_s_at	MRPS15	1.59	Down	0.0344157	9.57901	0.179051	8.90649	0.169855
AI375486	220319_s_at	MYLIP	1.62	Down	0.0360048	8.71984	0.138031	8.02554	0.21798
NM_000484	203595_s_at	IFIT5	1.6203	Down	0.037	8.48212	0.262501	7.78586	0.138593
NM_001170	207776_s_at	CACNB2	1.62403	Down	0.049562	3.99172	0.237558	3.29214	0.081627
NM_001181	202102_s_at	BRD4	1.62758	Down	0.04	9.6671	0.076408	8.96437	0.296047
N35112	201695_s_at	NP	1.63	Down	0.0154854	9.8765	0.166536	9.17178	0.128879
AW195882	202716_at	PTPN1	1.63	Down	0.0374808	9.26946	0.2035	8.56546	0.16908
AF095192	219520_s_at	WWC3	1.65	Down	0.047479	8.18605	0.271967	7.46098	0.105663
NM_024696	201584_s_at	DDX39	1.7	Down	0.0297169	11.0135	0.209861	10.2496	0.168809
NM_022898	201035_s_at	HADH	1.71	Down	0.026389	7.53458	0.209813	6.69016	0.127954
NM_001168	212078_s_at	MLL	1.77	Down	0.0225016	7.49899	0.224065	6.67261	0.152279
BF718610	202046_s_at	GRLF1	1.78404	Down	0.01092	5.19483	0.180317	4.35968	0.045925
AA824369	216941_s_at	TAF1B	1.8	Down	0.000130755	6.09512	0.080227	5.24357	0.056862
AK000993	219843_at	IPP	1.82	Down	0.0417825	7.07875	0.213409	6.21795	0.256503
NM_000724	205760_s_at	OGG1	1.84	Down	0.0473091	7.71243	0.251887	6.83455	0.256516
NM_004343	200935_at	CALR	1.87328	Down	0.038	8.93765	0.096393	8.03208	0.382963
NM_001222	205308_at	FAM164A	1.89	Down	0.0122534	7.21924	0.257253	6.30147	0.033523
NM_017918	214255_at	ATP10A	1.92	Down	0.0458185	6.7413	0.288189	5.80109	0.238975
NM_024296.3	217197_x_at	N4BP2L1	1.93	Down	0.0122726	7.01047	0.223435	6.06454	0.147054
NM_004702	205266_at	LIF	1.99	Down	0.0454249	5.94419	0.358604	4.94931	0.165965
NM_001838	201014_s_at	PAICS	2	Down	0.0238587	8.50838	0.28388	7.5073	0.174374
NM_006584	201267_s_at	PSMC3	2.00614	Down	0.022	10.2259	0.222014	9.22148	0.324543
NM_006566	208807_s_at	CHD3	2.02	Down	0.0193463	8.08148	0.370186	7.06889	0.071644
NM_000732	208723_at	USP11	2.02	Down	0.044075	9.33068	0.326479	8.31542	0.230581
NM_000733	218802_at	CCDC109B	2.03	Down	0.0222991	9.14477	0.264842	8.12385	0.203371
NM_000073	205285_s_at	FYB	2.03	Down	0.0315843	7.77222	0.237128	6.74977	0.279438
D28586	208149_x_at	DDX11	2.06	Down	0.0441495	7.45411	0.247004	6.41496	0.326365
NM_006137	214507_s_at	EXOSC2	2.07	Down	0.0251681	6.4593	0.292135	5.40886	0.200742
AW006735	220243_at	ZBTB44	2.07	Down	0.048499	3.61409	0.29403	2.56733	0.305344
NM_004931	202022_at	ALDOC	2.09	Down	0.0477787	7.85837	0.262359	6.79733	0.337868
NM_012072	215785_s_at	CYFIP2	2.09	Down	0.0387245	11.487	0.320609	10.4215	0.246053
NM_005816	212190_at	SERPINE2	2.14	Down	0.0383453	5.51196	0.316311	4.41205	0.270244
D88357	214794_at	PA2G4	2.16	Down	0.0450263	8.99529	0.231886	7.88667	0.372975
NM_001255	218724_s_at	TGIF2	2.17	Down	0.0110374	7.2667	0.255668	6.14631	0.17374
W81196	218805_at	GIMAP5	2.19	Down	0.0339741	9.3967	0.484157	8.26657	0.05573
M68520	207057_at	SLC16A7	2.22	Down	0.0432009	7.24479	0.216999	6.09278	0.395241
NM_005195	204917_s_at	MLLT3	2.23	Down	0.0440256	4.31427	0.444635	3.15912	0.094732
U91543	212224_at	ALDH1A1	2.24516	Down	0.031499	9.93698	0.307685	8.77016	0.185895
NM_001823	209932_s_at	DUT	2.3	Down	0.0264765	11.6732	0.252832	10.4711	0.324122
NM_014912	220485_s_at	SIRPG	2.33	Down	0.0354168	5.21582	0.437082	3.99409	0.114879
BC000185	212279_at	TMEM97	2.35	Down	0.0400418	8.29322	0.212798	7.06138	0.420977
NM_015986	203337_x_at	ITGB1BP1	2.41	Down	0.0221955	7.50038	0.161774	6.23241	0.381334
NM_001331	220999_s_at	CYFIP2	2.44	Down	0.0477113	8.84907	0.432381	7.56264	0.286018
NM_001565	203988_s_at	FUT8	2.47	Down	0.0485802	7.19536	0.429618	5.89127	0.307575
NM_002416	219221_at	ZBTB38	2.49	Down	0.0441177	10.908	0.246071	9.59304	0.455646
AL161999	202600_s_at	NRIP1	2.5	Down	0.0400015	8.59	0.199845	7.26823	0.464862
NM_030778	204252_at	CDK2	2.58	Down	0.0474247	8.75695	0.408111	7.3895	0.368832
NM_013385	204364_s_at	REEP1	2.59	Down	0.0191112	3.63549	0.400957	2.26141	0.161605
AB014559	215024_at	C7orf28B	2.62	Down	0.0218067	6.91756	0.279331	5.52926	0.354726
AL050350	208594_x_at	LILRB3	2.63933	Down	0.004691	8.18384	0.242756	6.78367	0.038384
NM_030653	206828_at	TXK	2.65	Down	0.006548	3.85244	0.288053	2.44798	0.189431
AI983033	204558_at	RAD54L	2.66	Down	0.0295587	5.36442	0.476743	3.95086	0.142892
NM_005804	213378_s_at	DDX12	2.73	Down	0.035081	6.7359	0.346881	5.28745	0.40649
NM_016076.3	214352_s_at	KRAS	2.73	Down	0.0450668	9.83876	0.226069	8.39061	0.527434
NM_000791	205967_at	HIST1H4C	2.8	Down	0.0403752	9.96554	0.474735	8.47813	0.317138
M74777	206975_at	LTA	2.8	Down	0.0442506	6.39356	0.553401	4.90829	0.190921
NM_024094	219000_s_at	DSCC1	2.85	Down	0.0377978	5.05278	0.663182	3.54411	0.084767
NM_014080	209881_s_at	LAT	2.85	Down	0.0448999	8.50177	0.592948	6.99238	0.073269
U90223	203372_s_at	SOCS2	2.85	Down	0.0264248	5.62923	0.434237	4.11634	0.280682
W45551	204128_s_at	RFC3	2.87	Down	0.0456809	5.54558	0.598326	4.02239	0.302965
AL117592	201810_s_at	SH3BP5	2.87	Down	0.0232914	8.62749	0.306136	7.10557	0.399567
D45421	204768_s_at	FEN1	2.88	Down	0.047389	7.98761	0.640022	6.46302	0.26038
NM_014556	204396_s_at	GRK5	2.89	Down	0.0310722	7.48557	0.53098	5.95322	0.130722
NM_014285	219734_at	SIDT1	2.94	Down	0.0280375	7.76424	0.471057	6.21017	0.263006
BF030508	217173_s_at	LDLR	2.96088	Down	0.026632	7.0524	0.383409	5.53594	0.591801
AK024432	211824_x_at	NLRP1	2.97	Down	0.0156285	5.59398	0.340576	4.02374	0.324262
NM_016010	221912_s_at	CCDC28B	2.98	Down	0.0106419	6.70668	0.378181	5.12921	0.207954
BC005004	215942_s_at	GTSE1	3	Down	0.0359946	5.80073	0.573104	4.21605	0.135195
NM_018088	208808_s_at	HMGB2	3.02	Down	0.0304948	11.8551	0.578296	10.2596	0.265106
NM_004111	202534_x_at	DHFR	3.04	Down	0.034566	8.25112	0.560686	6.6492	0.179039
NM_007076	206337_at	CCR7	3.09	Down	0.0149705	10.1286	0.305996	8.50146	0.372758
NM_023037	201315_x_at	IFITM2	3.09	Down	0.0496548	10.6144	0.569919	8.9872	0.339965
NM_004480	201189_s_at	ITPR3	3.11	Down	0.0281573	7.96343	0.333703	6.32628	0.460859
AI633888	210983_s_at	MCM7	3.22	Down	0.0444767	9.36799	0.647312	7.68222	0.154186
NM_003505	203470_s_at	PLEK	3.23234	Down	0.043836	10.8332	0.322352	9.14062	0.485027
NM_000156	202107_s_at	MCM2	3.28	Down	0.0462308	9.83793	0.652059	8.12257	0.209369
Y07846	220940_at	ANKRD36B	3.29	Down	0.037266	5.77948	0.29916	4.05927	0.571923
NM_018384	214032_at	ZAP70	3.44	Down	0.0482425	8.20728	0.657963	6.42621	0.292682
X61094	219528_s_at	BCL11B	3.47	Down	0.0148409	9.06174	0.323693	7.26825	0.420268
AA135522	219724_s_at	KIAA0748	3.48	Down	0.0201519	6.85413	0.505804	5.05501	0.270454
NM_005512	203835_at	LRRC32	3.48	Down	0.0259491	5.64869	0.430858	3.85159	0.453371
AB018310	214551_s_at	CD7	3.52	Down	0.0176522	6.75115	0.457841	4.93518	0.322835
NM_005308	219812_at	PVRIG	3.57	Down	0.0327231	9.52495	0.62866	7.69041	0.21361
NM_004491	200965_s_at	ABLIM1	3.63	Down	0.0477913	9.07512	0.544	7.21663	0.515319
BF973178	211430_s_at	IGHG1	3.66	Down	0.0493112	11.0824	0.643528	9.21155	0.406928
BC000306	203153_at	IFIT1	3.67	Down	0.048107	5.85944	0.659839	3.98388	0.572624
NM_014320	204747_at	IFIT3	3.7	Down	0.158252	8.3573	1.27078	6.47001	0.376356
NM_018063	204633_s_at	RPS6KA5	3.72	Down	0.0458302	8.68962	0.393523	6.79347	0.64443
NM_003542	209406_at	BAG2	3.9	Down	0.0431222	6.09018	0.681608	4.12616	0.354536
M60721	203413_at	NELL2	3.93	Down	0.0291578	7.66715	0.519567	5.69226	0.493736
BC000903	221591_s_at	FAM64A	3.94	Down	0.0109531	4.59514	0.54451	2.61684	0.019219
U29343	204040_at	RNF144A	4.22	Down	0.0350291	5.60141	0.73033	3.52475	0.230457
S79910	221648_s_at	DESI2	4.26	Down	0.0267149	7.35321	0.604658	5.26379	0.383732
NM_014147	206761_at	CD96	4.33	Down	0.0331243	6.98281	0.77463	4.86861	0.369395
NM_016387	211796_s_at	TRBC2	4.33	Down	0.0491276	12.3004	0.650054	10.187	0.561743
M85289	205034_at	CCNE2	4.4	Down	0.0441131	5.71894	0.508298	3.58095	0.671148
NM_000203	219014_at	PLAC8	4.4	Down	0.0297117	8.88215	0.656061	6.74428	0.371129
BC002857	204887_s_at	PLK4	4.43	Down	0.0458386	5.19778	0.836445	3.05099	0.176849
NM_001548	212071_s_at	SPTBN1	4.43	Down	0.0258732	9.46443	0.556314	7.31696	0.472487
NM_001549	206364_at	KIF14	4.55	Down	0.0415486	6.1133	0.72196	3.92724	0.441047
N47725	202086_at	MX1	4.62	Down	0.037348	10.3569	0.790327	8.15011	0.2486
NM_003641	204777_s_at	MAL	4.64	Down	0.0467302	11.6301	0.705192	9.41481	0.538427
NM_006435	209709_s_at	HMMR	4.79	Down	0.0366881	5.36469	0.776932	3.10338	0.331636
M87789	204891_s_at	LCK	4.81	Down	0.0407331	10.7876	0.751568	8.52037	0.443101
AW269792	204563_at	SELL	4.93	Down	0.0255537	10.5315	0.511679	8.23136	0.587725
NM_005897	213539_at	CD3D	5.01	Down	0.0324316	11.5116	0.731866	9.18671	0.41097
NM_002201	205085_at	ORC1L	5.06	Down	0.0457276	4.58668	0.926946	2.24844	0.081461
NM_004763	201601_x_at	IFITM1	5.82	Down	0.0315488	10.5814	0.84594	8.04079	0.336428
D13720	206804_at	CD3G	5.88	Down	0.0341286	6.67432	0.855177	4.11754	0.380768
NM_002224	212590_at	RRAS2	5.92	Down	0.0259209	6.55266	0.77574	3.98603	0.399942
NM_021991	204698_at	ISG20	6.01	Down	0.0289708	9.32356	0.806366	6.73638	0.413102
NM_014772	201397_at	PHGDH	6.07	Down	0.0173344	7.23996	0.798163	4.63753	0.041886
AI758896	210038_at	PKC	6.1	Down	0.0424718	9.02181	0.832941	6.41395	0.581218
NM_014796	205456_at	CD3E	6.16	Down	0.0334741	9.20277	0.637551	6.58074	0.710888
NM_014875	220085_at	HELLS	6.19	Down	0.0417565	6.88579	0.705147	4.25617	0.735811
NM_012310	210039_s_at	PRKCQ	6.37	Down	0.0413482	8.04551	0.912071	5.37361	0.484143
NM_017415	218355_at	KIF4A	6.65	Down	0.0472559	5.90107	1.0979	3.16774	0.032317
BF673699	211339_s_at	ITK	6.86	Down	0.0363378	9.60414	0.542456	6.82579	0.8816
BC000879	211478_s_at	DPP4	7.11	Down	0.00498439	7.44172	0.48865	4.61091	0.436664
J03202	208131_s_at	PTGIS	7.14	Down	0.0486753	5.207	1.14761	2.37024	0.074548
AF036905	205758_at	CD8A	8.16	Down	0.0461512	11.3158	0.992552	8.28635	0.690061
NM_005356	203915_at	CXCL9	8.22	Down	0.0427965	8.73955	0.747784	5.70016	0.921017
S70123	212023_s_at	MKI67	8.52	Down	0.0435777	6.36603	1.17546	3.27449	0.299744
NM_002309	219148_at	PBK	8.6	Down	0.0362217	6.03908	1.14562	2.93531	0.14947
NM_024318	202870_s_at	CDC20	8.78	Down	0.0318402	7.50269	1.28388	4.3686	0.282629
NM_002333	210559_s_at	CDC2	9.23	Down	0.0489089	6.57561	1.25966	3.3699	0.327198
NM_000595	202095_s_at	BIRC5	9.42	Down	0.048363	7.66354	1.1893	4.42763	0.547614
NM_002371	210052_s_at	TPX2	10.1	Down	0.0489739	7.57986	1.18763	4.24395	0.652052
NM_005908	218237_s_at	SLC38A1	12.2	Down	0.0454872	10.8131	0.620827	7.20392	1.29273
NM_000240	204533_at	CXCL10	13.17	Down	0.040251	8.12575	0.944119	4.40692	1.06891
NM_002757	207979_s_at	CD8B	14.23	Down	0.00506028	9.89701	0.862618	6.06661	0.217342
BG034972	204389_at	MAOA	1.5	Up	0.0156651	9.33477	0.16824	9.92063	0.05014
NM_004526	204901_at	BTRC	1.51	Up	0.0300232	4.98642	0.172415	5.58302	0.121524
AF279900	221953_s_at	EDEM2	1.51	Up	0.00254585	7.8074	0.107553	8.39839	0.051136
BE567032	213185_at	KIAA0556	1.51	Up	0.028412	7.0218	0.032796	7.61255	0.203178
AU147044	216322_at	CD58	1.52	Up	0.0437128	5.04317	0.119456	5.64657	0.204669
AA704766	210687_at	CPT1A	1.52	Up	0.0217766	4.17181	0.17054	4.77672	0.097935
AV756536	218697_at	NCKIPSD	1.52	Up	0.0035637	8.74023	0.094878	9.34342	0.089124
AF213666	204590_x_at	VPS33A	1.52	Up	0.0244683	5.96396	0.083239	6.56475	0.183226
NM_031280	219183_s_at	CYTH4	1.53	Up	0.0436847	10.6042	0.137688	11.2178	0.197746
NM_002462	203778_at	MANBA	1.53	Up	0.0329336	8.65525	0.153415	9.27142	0.162391
NM_000256	208733_at	RAB2A	1.53	Up	0.0457916	4.20512	0.19553	4.81417	0.143391
NM_013262	219727_at	DUOX2	1.54	Up	0.0249269	2.6085	0.147376	3.2274	0.147229
AL049785	213785_at	IPO9	1.54	Up	0.0435868	4.8239	0.154349	5.44385	0.188039
NM_016453	210752_s_at	MLX	1.54	Up	0.0284379	6.07741	0.089146	6.70216	0.198614
NM_006159	208040_s_at	MYBPC3	1.54	Up	0.0166611	4.30539	0.13036	4.9256	0.136356
AF229062	208890_s_at	PLXNB2	1.54	Up	0.0478614	11.2185	0.121626	11.8458	0.22186
NM_000270	220998_s_at	UNC93B1	1.54	Up	0.0438473	8.87236	0.129532	9.49399	0.207205
AB014573	214014_at	CDC42EP2	1.56	Up	0.0479276	3.66085	0.201055	4.29924	0.16106
AI824012	220453_at	PQLC2	1.56	Up	0.0293437	4.60684	0.130062	5.2473	0.18367
NM_002537	210790_s_at	SAR1A	1.56	Up	0.0464196	5.92518	0.223444	6.57031	0.128731
NM_016821	213118_at	UHRF1BP1L	1.56	Up	0.0483443	7.9387	0.173736	8.57682	0.190963
AI991887	200602_at	APP	1.56445	Up	0.035	9.54984	0.170105	10.1955	0.20893
NM_004153	209721_s_at	IFFO1	1.57	Up	0.048603	9.5542	0.131749	10.2078	0.229765
BF669264	212662_at	PVR	1.57	Up	0.00814426	7.46557	0.130153	8.12051	0.107297
BF675004	213082_s_at	SLC35D2	1.57	Up	0.035888	8.23139	0.17331	8.88138	0.167929
AB011174	206587_at	CCT6B	1.58	Up	0.012745	5.57179	0.153524	6.23455	0.017208
NM_006452	203973_s_at	CEBPD	1.58	Up	0.0420681	8.98537	0.178542	9.64654	0.184574
NM_018492	205211_s_at	RIN1	1.58	Up	0.0451565	6.59016	0.175973	7.24874	0.192916
BF939522	207992_s_at	AMPD3	1.59	Up	0.0428864	9.02744	0.085838	9.69318	0.24544
NM_006623	34406_at	PACS2	1.59	Up	0.0388633	9.0004	0.200397	9.66853	0.155541
NM_012327	222163_s_at	SPATA5L1	1.6	Up	0.0432973	8.60893	0.247541	9.29128	0.100703
AF136970	206130_s_at	ASGR2	1.62	Up	0.0370528	7.3182	0.241093	8.01075	0.095817
AL137145	212981_s_at	FAM115A	1.62	Up	0.0444284	6.56758	0.152478	7.26658	0.229851
NM_016619	212856_at	GRAMD4	1.62	Up	0.0464617	8.50362	0.165551	9.19724	0.2225
AI433595	206416_at	ZNF205	1.62	Up	0.0366437	6.10432	0.22091	6.80218	0.138266
NM_006622	218844_at	ACSF2	1.63	Up	0.0463241	8.85124	0.222539	9.5519	0.169768
NM_014264	31874_at	GAS2L1	1.64	Up	0.0184796	8.86994	0.142676	9.58802	0.172734
AL136663	203525_s_at	APC	1.65	Up	0.0429077	8.26277	0.271042	8.98842	0.082968
BC004542	201087_at	PXN	1.65	Up	0.0471067	9.14379	0.194416	9.86809	0.216235
NM_005761	201365_at	OAZ2	1.66	Up	0.0361639	9.30763	0.222329	10.0364	0.155234
NM_017765	204054_at	PTEN	1.66	Up	0.004618	5.58803	0.013018	6.32143	0.127522
L01087	205896_at	SLC22A4	1.67	Up	0.0226284	5.96129	0.214248	6.69893	0.112879
AL545523	218833_at	ZAK	1.67	Up	0.045066	5.12846	0.222568	5.86557	0.189146
NM_000314	219218_at	BAHCC1	1.68	Up	0.0255737	3.03734	0.142596	3.78513	0.209454
NM_000961	201939_at	PLK2	1.68	Up	0.0235232	3.64388	0.140672	4.39239	0.20448
NM_002827	204381_at	LRP3	1.69	Up	0.00656543	6.436	0.124235	7.19281	0.138269
NM_002828	219048_at	PIGN	1.69	Up	0.0376996	7.75343	0.215655	8.51252	0.187471
BE615277	202888_s_at	ANPEP	1.7	Up	0.0406342	11.8639	0.231428	12.6336	0.184529
NM_024070	206955_at	AQP7	1.7	Up	0.0365991	4.14652	0.1528	4.9138	0.242277
NM_002859	205059_s_at	IDUA	1.7	Up	0.014507	6.05004	0.147045	6.8156	0.170576
AW301641	220692_at	HSPC047	1.71	Up	0.0120635	5.89944	0.081775	6.67115	0.201375
NM_004703	204756_at	MAP2K5	1.71	Up	0.0426771	7.5548	0.125308	8.32779	0.274203
NM_003579	203223_at	RABEP1	1.71	Up	0.0396501	6.61044	0.166824	7.38098	0.242375
BE535746	219801_at	ZNF34	1.71	Up	0.0149531	6.30361	0.158608	7.07418	0.164249
NM_002915	221828_s_at	FAM125B	1.72	Up	0.00840668	6.86241	0.137527	7.64073	0.147782
NM_004292	214128_at	DAGLA	1.74	Up	0.0220153	5.93035	0.223814	6.72725	0.131917
NM_014746	205458_at	MC1R	1.74	Up	0.0239984	5.49058	0.129719	6.28923	0.23244
AF074393	221538_s_at	PLXNA1	1.75	Up	0.036413	6.8354	0.193923	7.64368	0.230613
AI431643	220535_at	FAM90A1	1.76	Up	0.0239565	3.4586	0.078195	4.2782	0.261609
BC001766	215890_at	GM2A	1.77	Up	0.0293582	2.30222	0.091902	3.12846	0.275451
BC003658	204935_at	PTPN2	1.77	Up	0.00605628	3.89485	0.124255	4.71516	0.154139
AB028957	204072_s_at	FRY	1.8	Up	0.0332233	6.1902	0.243498	7.04145	0.190839
NM_000655	220371_s_at	SLC12A9	1.8	Up	0.0447978	8.60232	0.222556	9.44841	0.249963
AL541302	214220_s_at	ALMS1	1.81	Up	0.0224414	6.5148	0.202794	7.37319	0.194821
AL562152	213471_at	NPHP4	1.81	Up	0.0234771	4.29962	0.106492	5.15951	0.264337
NM_001649	219229_at	SLCO3A1	1.81	Up	0.0457052	8.36398	0.255833	9.21947	0.224546
NM_017699	205773_at	CPEB3	1.84	Up	0.049982	4.75963	0.250176	5.6419	0.259594
NM_003830	221221_s_at	KLHL3	1.84	Up	0.0246097	5.82562	0.260152	6.70392	0.138346
NM_018556	218801_at	UGCGL2	1.84	Up	0.0454539	5.11364	0.243827	5.9943	0.250881
NM_020246	208407_s_at	CTNND1	1.85	Up	0.0414554	8.58474	0.290919	9.46915	0.179904
NM_004695	206599_at	SLC16A5	1.85	Up	0.0156103	3.57167	0.194589	4.45562	0.179372
NM_004731	205708_s_at	TRPM2	1.86	Up	0.0157843	6.79323	0.144727	7.68985	0.226941
NM_003059	206838_at	TBX19	1.87	Up	0.040655	5.95273	0.169129	6.85885	0.304696
NM_003060	222134_at	DDO	1.89	Up	0.0451976	6.0465	0.288715	6.9612	0.219644
AJ005866	219632_s_at	TRPV1	1.89	Up	0.0290154	4.69583	0.125292	5.61703	0.297422
NM_030674	204063_s_at	ULK2	1.9	Up	0.0234652	5.51343	0.18827	6.44204	0.243402
NM_013272	207446_at	TLR6	1.91	Up	0.0200176	3.97215	0.24912	4.90847	0.163537
N73970	213488_at	SNED1	1.93	Up	0.0225127	5.02813	0.260565	5.97417	0.16828
NM_014723	222025_s_at	OPLAH	1.94	Up	0.03984	6.2682	0.274038	7.2267	0.243375
AB004903	200884_at	CKB	1.95	Up	0.0430463	8.56677	0.30854	9.52702	0.213926
BE890973	214438_at	HLX	1.96	Up	0.0145844	10.2556	0.225734	11.2291	0.176795
BE968833	211177_s_at	TXNRD2	1.97	Up	0.0422214	6.92689	0.269012	7.90412	0.268321
NM_024592	221980_at	EMILIN2	1.98	Up	0.0484821	5.78861	0.357423	6.77616	0.237979
AK026521	205074_at	SLC22A5	1.98	Up	0.0346598	5.77393	0.183422	6.76051	0.312971
NM_005149	221245_s_at	DKFZp	2.01	Up	0.0209077	6.85562	0.296326	7.86613	0.133848
NM_021809	206020_at	HSPC060	2.02	Up	0.0415805	6.39219	0.318563	7.40307	0.227231
AI983505	221605_s_at	PIPOX	2.05	Up	0.0289919	7.32951	0.306966	8.36472	0.193
AF162666	213100_at	UNC5B	2.05	Up	0.0253307	5.24251	0.210051	6.28128	0.281345
NM_006068	202241_at	TRIB1	2.06	Up	0.0206932	11.5794	0.210429	12.621	0.259715
BE779865	215167_at	MED14	2.07	Up	0.0141986	4.66579	0.260027	5.71719	0.164534
BG258639	204393_s_at	ACPP	2.1	Up	0.0453739	4.27358	0.319914	5.3414	0.278232
AF098158	204303_s_at	KIAA0427	2.1	Up	0.0180389	5.22508	0.163775	6.29374	0.288148
AF043179	200770_s_at	LAMC1	2.1	Up	0.0298681	7.5265	0.293396	8.59574	0.23757
NM_025195	208161_s_at	ABCC3	2.12204	Up	0.02279	7.94495	0.156701	9.0304	0.257749
AA114843	207315_at	CD226	2.20288	Up	0.036	7.542	0.379928	8.68139	0.250452
AI051254	212510_at	GPD1L	2.25	Up	0.0398209	9.13003	0.415216	10.3024	0.168857
AF196175	213435_at	SATB2	2.26	Up	0.04333	5.24218	0.398876	6.41541	0.228306
NM_012339	209699_x_at	AKR1C2	2.27	Up	0.0158201	4.69527	0.200178	5.87968	0.29409
NM_003328	214639_s_at	HOXA1	2.29	Up	0.0315538	4.16306	0.288755	5.35625	0.315347
AB019695	201655_s_at	HSPG2	2.36	Up	0.0219314	5.87726	0.179085	7.11348	0.360607
NM_020121	202878_s_at	CD93	2.37	Up	0.0465087	9.45928	0.33007	10.707	0.374272
AL136821	218800_at	SRD5A3	2.37	Up	0.0239915	4.71767	0.395742	5.96112	0.122981
NM_014683	210839_s_at	ENPP2	2.4	Up	0.00191959	8.06777	0.159448	9.32949	0.179809
AA127885	201015_s_at	JUP	2.47	Up	0.0319302	8.97382	0.391717	10.2773	0.257195
NM_030930	219432_at	EVCL	2.53	Up	0.0129551	5.61698	0.278557	6.95892	0.264766
BC000350	219810_at	VCPIP1	2.55684	Up	0.044906	4.74924	0.419185	6.1036	0.71342
NM_025054	204151_x_at	AKR1C1	2.8	Up	0.00705635	4.91943	0.154519	6.40241	0.33622
NM_022916	213885_at	TRIM3	2.82494	Up	0.0472518	5.05595	0.159142	5.6392	0.31422
NM_018458	204451_at	FZD1	2.83	Up	0.0244023	8.02235	0.478943	9.52131	0.149601
NM_016653	49452_at	ACACB	2.95	Up	0.0118941	5.90579	0.214458	7.46825	0.382603
AI817942	220000_at	SIGLEC5	2.97	Up	0.0288304	6.10222	0.519022	7.67406	0.181189
NM_024724	210379_s_at	TLK1	3.03	Up	0.00991493	4.88954	0.347023	6.48663	0.253828
NM_014155	218693_at	TSPAN15	3.24	Up	0.0203272	7.78953	0.443955	9.48657	0.311266
NM_003456	209686_at	S100B	3.40334	Up	0.030093	6.21083	0.298353	7.97778	0.445726
W46291	213790_at	ADAM12	3.81	Up	0.0472726	7.43178	0.841277	9.36208	0.27806
NM_030580	204967_at	SHROOM2	10.77	Up	0.0118286	3.22354	0.745403	6.65186	0.606793
Up-regulated	116
Down-regulated	144
